# Supplementary material for: Phenotypic differentiation of the slow worm lizards (Squamata: Anguis) across their contact zone in Central Europe
Source: PeerJ. 2021 Dec 21;9:e12482. doi: 10.7717/peerj.12482 (PMC8706331; doi:10.7717/peerj.12482)
Supplement: Supplemental Information 1 [file peerj-09-12482-s001.xlsx]

## Sheet: Anguis Central Europe dataset
Taxon	COUNTRY	latitude	longitude	Sex	Age	Agecode	SVL	TL	TREG	HL1	HL2	HW	HH	NL	NRL	EYL	EYRL	LEAVcode	REAVcode	EARS	ML	PH	PW	D	V	SCD	SCR1	SCR2	SCR3	SCR4	A	PRF	PRFcode	LSO	RSO	LSLAB	RSLAB	LSUM	RSUM	VLINE	BORDER	ABDOMEN	BSPT	JUVTOTALSCORE
Anguis fragilis	SLOVAKIA	48.06	17.15	M	A	0	205			15.1	17.8	9.7	6.9	1	1.6	2.8	5.7	0	0	0	11	8.6	9.7	135	140		26	24	999	12	8	C	2	999	999	999	999	999	999	3	3	2	0	8
Anguis fragilis	SLOVAKIA	48.06	17.15	M	A	0	191			14.5	16.8	10.2	7.5	0.75	1.35	3	5.7	1	1	2	11.3	9	10.2	133	136		26	26	22	14	8	A	0	999	999	999	999	999	999	3	3	2	1	9
Anguis fragilis	SLOVAKIA	48.06	17.15	M	A	0	218			16	18.9	10.7	8.1	0.8	1.3	2.8	6	0	0	0	11.7	8.5	9.8	138	145		26	26	22	14	6	X	3	999	999	999	999	999	999	3	3	3	0	9
Anguis fragilis	SLOVAKIA	48.05	17.16	M	A	0	174	214		11.9	13.9	8.5	5.9	0.7	1.1	2.8	4.7	1	1	2	8.2	7.6	8.8	137	142	146	28	26	24	14	8	A	0	999	999	999	999	999	999	1	1	1	0	3
Anguis fragilis	SLOVAKIA	48.05	17.15	M	A	0	219	259		17	18.1	11.3	8.2	0.8	1.4	3.55	6.6	1	1	2	11.95	10.1	11	131	138	144	30	28	24	14	8	999	999	999	999	999	999	999	999	3	3	3	3	12
Anguis fragilis	SLOVAKIA	48.06	17.16	M	A	0	234			16.9	18	12.2	8.65	0.9	1.4	999	6.5	2	2	4	12	9.7	11.3	130	138		26	27	22	12	8	X	3	999	999	999	999	999	999	3	3	0	3	9
Anguis fragilis	SLOVAKIA	48.06	17.16	M	A	0	217	259		14.9	17.9	11.6	7.7	0.75	1.7	3.1	5.9	1	1	2	11.9	9.7	11	136	143	140	26	26	22	14	8	999	999	999	999	999	999	999	999	3	3	3	2	11
Anguis fragilis	SLOVAKIA	48.06	17.15	M	A	0	229	280		17.1	18.1	11.6	7.7	0.8	1.5	3.7	6.7	2	2	4	11.8	9.6	11.9	135	141	152	26	26	22	14	8	C	2	999	999	999	999	999	999	3	3	2	1	9
Anguis fragilis	SLOVAKIA	48.06	17.15	M	A	0	223			16.3	18.2	11.6	7.6	0.9	1.6	3.2	6.1	1	1	2	11.3	9.5	10.3	137	143		28	28	22	14	7	A	0	999	999	999	999	999	999	3	3	3	1	10
Anguis fragilis	CZECH_RE	48.99	13.65	M	A	0	161			11.7	13	8.2	5.9	0.5	0.8	2.8	4.6	1	0	1	9.3	8.5	8.2	133	131	999	26	26	22	14	9	A	0	3	4	9	9	4	4	999	999	999	999	999
Anguis fragilis	CZECH_RE	50.1	14.39	M	A	0	227			999	17.3	11.3	999	999	999	999	999	0	0	0	999	999	999	137	131		24	24	22	14	8	B	1	4	4	999	999	999	999	3	3	2	1	9
Anguis fragilis	CZECH_RE	48.91	13.83	M	A	0	137	148		10.3	11.5	6.8	5.2	0.4	1	2.1	3.7	0	0	0	7.3	6.3	7.1	132	138	127	24	24	20	12	8	A	0	3	3	8	8	3	3	999	999	999	999	999
Anguis fragilis	CZECH_RE	49.06	13.56	M	A	0	151		999	12	13.4	7.5	5.4	999	999	999	999	0	0	0	999	999	999	999	999	999	999	26	999	999	999	A	0	3	3	999	999	999	999	3	999	999	0	999
Anguis fragilis	CZECH_RE	50.16	14.75	M	A	0	176			12.3	14	999	999	999	999	999	999	1	1	2	999	999	999	129	136		26	26	22	14	999	A	0	3	3	999	999	999	999	999	999	999	999	999
Anguis fragilis	CZECH_RE	50.39	14.09	M	A	0	166	999	999	999	999	999	999	999	999	999	999	999	999		999	999	999	999	140	999	26	999	24	999	999	A	0	3	3	999	999	999	999	3	2	1	0	6
Anguis fragilis	CZECH_RE	49.99	14.41	M	A	0	999	999	999	999	999	999	999	999	999	999	999	999	999		999	999	999	136	140	999	27	26	22	14	8	C	2	3	3	999	999	999	999	3	3	1	0	7
Anguis fragilis	CZECH_RE	50.34	13.05	M	A	0	169	181		999	999	999	999	999	999	999	999	999	999		999	7.9	8.3	129	133	133	26	24	22	12	8	B	1	3	3	999	999	4	4	3	2	1	0	6
Anguis fragilis	CZECH_RE	50	14.42	M	A	0	136	158		10.9	11.9	7.6	5.7	999	999	999	999	0	0	0	999	999	999	130	138	133	26	24	22	14	999	A	0	3	3	999	999	999	999	999	999	999	999	999
Anguis fragilis	CZECH_RE	49.3	15.75	M	A	0	189			14.9	16	999	999	999	999	999	999	999	999		999	9.9	10.4	134	136		26	26	22	12	8	A	0	3	3	9	9	4	4	3	3	2	2	10
Anguis fragilis	CZECH_RE	49.4	14.36	M	A	0	172			999	999	999	999	999	999	999	999	999	999		999	999	8.5	138	135		26	26	24	14	8	A	0	3	4	999	999	999	999	3	2	1	0	6
Anguis fragilis	CZECH_RE	50.39	14.09	M	A	0	178		999	999	999	999	999	999	999	999	999	999	999		999	9.5	9.5	131	136	999	26	24	21	12	999	A	0	3	3	999	999	999	999	3	3	3	0	9
Anguis fragilis	CZECH_RE	50.33	13.05	M	A	0	189	999	999	14.6	15.5	9.3	7.2	999	999	999	999	999	999		999	999	999	140	128	999	999	26	22	14	8	A	0	3	4	999	999	999	999	3	2	3	2	10
Anguis fragilis	CZECH_RE	49.06	14.75	M	A	0	150	167		12.6	12.7	999	999	999	999	999	999	999	999		999	999	999	138	138	134	26	24	22	12	8	B	1	3	3	999	999	999	999	2	2	1	0	5
Anguis fragilis	CZECH_RE	49.77	14.21	M	A	0	138			10.4	11.6	6.6	5.3	0.4	1	2.6	3.8	999	999		7.1	6.8	6.8	140	999		26	25	999	12	8	A	0	3	3	999	999	999	999	3	1	1	0	5
Anguis fragilis	CZECH_RE	49.77	14.21	M	A	0	164	198		11	999	8	5.2	999	999	999	999	999	999		999	999	999	133	136	140	26	26	21	14	8	C	2	3	3	999	999	999	999	3	1	1	0	5
Anguis fragilis	CZECH_RE	48.95	13.61	M	A	0	129	999	999	10.4	10.6	6.2	4.6	0.4	0.7	2.1	3.5	0	0	0	7.2	5.7	6.2	133	136		26	24	20	12	999	A	0	3	3	8	8	3	3	999	999	999	999	999
Anguis fragilis	CZECH_RE	50.53	15.72	M	A	0	182	219		13.5	15.4	999	999	999	999	999	999	1	1	2	999	999	999	129	132	145	26	24	22	999	999	C	2	4	4	999	999	999	999	999	999	999	999	999
Anguis fragilis	CZECH_RE	49.95	14.26	M	A	0	207			14.4	15.6	10.8	8.1	0.6	1.1	3.2	5.2	0	1	1	13.1	9.8	10.5	134	138		26	26	21	12	8	B	1	3	3	9	9	3	3	3	3	999	0	999
Anguis fragilis	CZECH_RE	48.8	14.14	M	A	0	164	191		12.9	15	999	999	999	999	999	999	0	0	0	999	8	8.5	125	132	132	25	25	21	12	8	B	1	3	3	999	999	4	3	3	999	999	0	999
Anguis fragilis	CZECH_RE	49.06	14.9	M	A	0	172			12.7	13.9	999	999	999	999	999	999	1	1	2	999	999	999	132	135		26	26	22	14	999	A	0	3	3	999	999	999	999	999	999	999	0	999
Anguis fragilis	CZECH_RE	49.98	14.41	M	A	0	180	999	999	999	999	999	999	999	999	999	999	999	999		999	999	999	132	134	999	26	25	22	999	999	A	0	4	4	999	999	3	3	3	3	2	0	8
Anguis fragilis	CZECH_RE	49.04	15.1	M	A	0	174			14.4	15.7	10.4	8.1	0.6	1.1	2.6	5.1	0	0	0	12.1	10	10.2	132	137		28	26	24	14	8	A	0	3	3	8	9	3	3	3	2	2	1	8
Anguis fragilis	CZECH_RE	50.03	14.45	M	A	0	183	999	999	14.2	999	999	999	999	999	999	999	999	999		999	999	999	130	139	999	28	999	22	14	8	A	0	3	3	999	999	4	4	3	3	3	1	10
Anguis fragilis	SLOVAKIA	48.06	17.15	M	A	0	230	999	999	17.8	20.2	999	999	999	999	999	999	1	1	2	999	999	999	125	129	999	28	26	21	14	8	A	0	3	3	9	9	4	4	3	3	2	0	8
Anguis fragilis	CZECH_RE	49.35	15.54	M	A	0	150			999	999	999	999	999	999	999	999	0	0	0	999	999	999	999	999	999	999	999	999	999	999	999	999	999	999	999	999	999	999	1	1	1	0	3
Anguis fragilis	SLOVAKIA	48.06	17.15	F	A	0	215			14.1	15.3	9.2	6.3	0.6	1	2.5	4.7	1	1	2	10.1	8.45	10.3	138	145		26	25	22	14	8	C	2	999	999	999	999	999	999	2	1	1	0	4
Anguis fragilis	CZECH_RE	49.06	13.56	F	A	0	173	168		11.1	11.9	7.7	5.5	0.4	1.1	2.3	4.2	0	0	0	8.7	7.1	8.1	134	137	124	26	26	22	12	8	A	0	3	3	8	9	3	3	0	1	1	0	2
Anguis fragilis	CZECH_RE	50.27	15.02	F	A	0	175			12	13.4	8.3	5.6	0.4	0.9	3	4.5	0	0	0	8	8.3	8.4	130	135	999	26	25	22	14	8	A	0	3	3	9	9	3	3	2	999	999	0	999
Anguis fragilis	CZECH_RE	48.99	13.65	F	A	0	175	175		10.5	13.3	8	5.6	0.5	1.2	2.4	4.1	1	1	2	999	999	999	999	999	999	999	26	999	999	999	B	1	999	999	999	999	999	999	0	1	999	0	999
Anguis fragilis	CZECH_RE	48.86	13.82	F	A	0	154	999	999	10.9	12.8	7.2	5.1	0.3	0.9	2.6	3.7	0	0	0	7.5	999	8.3	129	135	999	26	24	999	12	999	A	0	3	3	9	9	999	999	0	0	0	0	0
Anguis fragilis	CZECH_RE	49.24	13.39	F	A	0	191			13.4	14.2	999	999	999	999	999	999	0	0	0	999	999	999	132	130		28	26	23	13	999	B	1	3	3	999	999	999	999	999	999	999	999	999
Anguis fragilis	CZECH_RE	48.91	13.83	F	A	0	172			12.4	12.4	8.3	6.8	0.5	0.9	2.6	4.5	0	0	0	9.5	999	8.7	131	140	999	28	26	22	999	10	C	2	3	3	9	9	3	4	0	999	999	0	999
Anguis fragilis	CZECH_RE	48.91	13.83	F	A	0	148			10	11.3	6.6	5.1	0.4	0.8	999	999	0	0	0	7.7	6.9	6.7	127	134		24	24	22	12	8	A	0	3	3	9	8	3	3	0	999	999	0	999
Anguis fragilis	CZECH_RE	48.91	13.83	F	A	0	148	165		10.4	11.2	7.3	5.7	0.4	0.9	2.2	4.3	0	0	0	8	6.7	7.7	127	133	135	26	24	21	12	8	B	1	3	3	9	8	5	3	0	999	999	0	999
Anguis fragilis	CZECH_RE	49.72	14.33	F	A	0	172	199		11.8	13	8	6	0.4	0.7	2.8	4	0	0	0	8.6	8.4	9.1	128	136	135	26	26	22	14	9	B	1	3	3	9	9	4	3	1	999	999	0	999
Anguis fragilis	CZECH_RE	49.98	14.4	F	A	0	180	999	999	999	999	999	999	999	999	999	999	999	999		999	999	999	999	134	999	28	26	999	999	999	B	1	4	3	999	999	999	999	2	1	1	0	4
Anguis fragilis	CZECH_RE	49.85	15.16	F	A	0	160			11.5	12.6	7.7	5.9	0.5	1	2.6	4.5	0	0	0	8.4	8.7	8.7	128	130		26	25	22	12	8	A	0	3	4	999	999	3	3	0	1	0	0	1
Anguis fragilis	CZECH_RE	49.79	15.22	F	A	0	191			12.9	13.7	9.2	7	999	999	999	999	0	0	0	999	9.4	10	131	135		26	26	22	14	8	A	0	3	3	999	999	999	999	2	0	0	0	2
Anguis fragilis	CZECH_RE	50.51	15.51	F	A	0	146	161		9.7	10.3	6.7	4.8	0.4	1	2.5	3.4	0	0	0	6.7	7.9	7.6	134	136	147	27	26	22	14	8	A	0	3	3	9	9	4	4	0	0	0	0	0
Anguis fragilis	CZECH_RE	49.3	15.75	F	A	0	173			12.5	13.7	8.8	6.8	0.6	1.3	2.4	4.8	0	0	0	8.8	8.5	8.7	136	137		26	26	22	14	8	B	1	4	4	9	9	4	4	0	1	1	0	2
Anguis fragilis	CZECH_RE	50.94	14.46	F	A	0	147	166		10.9	12.2	999	999	999	999	999	999	1	1	2	999	999	999	128	134	127	26	24	21	12	8	A	0	3	3	999	999	999	999	0	0	0	0	0
Anguis fragilis	CZECH_RE	49.06	14.75	F	A	0	139	999	999	10.2	11.4	999	999	999	999	999	999	999	999		999	999	999	137	148	999	26	26	22	13	9	A	0	3	3	999	999	999	999	1	1	0	0	2
Anguis fragilis	CZECH_RE	49.98	14.41	F	A	0	163			11.8	12.6	8.9	5.8	0.5	0.9	2.4	4.3	0	0	0	8	8.7	7.9	130	139		26	26	22	12	8	A	0	3	3	8	9	3	3	1	1	0	0	2
Anguis fragilis	CZECH_RE	48.95	13.61	F	A	0	168	999	999	11.3	12.1	7.2	5.4	0.4	1.2	2.4	4	0	0	0	8.6	7.5	8	137	141	999	26	26	22	12	8	X	3	3	3	9	9	3	3	999	999	999	999	999
Anguis fragilis	CZECH_RE	49.08	13.56	F	A	0	161			11.8	11.8	8.2	5.9	0.4	1.2	3	4.1	0	0	0	9.1	7.4	7.3	131	139	999	26	26	22	14	8	A	0	3	3	8	9	4	3	0	999	999	0	999
Anguis fragilis	CZECH_RE	49.1	13.54	F	A	0	191	211		12.4	13.7	8.8	6.7	0.6	1.2	2.6	5	1	1	2	8.9	7.9	8.2	132	140	142	28	26	22	14	8	A	0	3	3	9	8	3	3	0	1	1	0	2
Anguis fragilis	CZECH_RE	49.91	15.22	F	A	0	140	167		10.5	11.7	6.1	5	999	999	999	999	0	0	0	999	999	999	999	999	999	999	24	999	999	999	B	1	3	3	999	999	999	999	2	999	999	0	999
Anguis fragilis	CZECH_RE	49.99	14.85	F	A	0	180			12.4	13.7	7.9	6.2	0.4	0.9	2.9	4.1	0	0	0	8	8	8.5	133	142		26	25	23	12	9	A	0	3	4	9	9	4	3	3	999	999	0	999
Anguis fragilis	CZECH_RE	49.39	14.48	F	A	0	207	999	999	13.3	15.2	8.6	7.5	0.5	1.1	3.3	5.1	1	0	1	11.3	9.8	11	127	129	999	29	26	22	14	8	X	3	3	3	9	9	999	999	2	999	999	0	999
Anguis fragilis	CZECH_RE	48.73	14.11	F	A	0	164			11	11.4	7.2	5.5	0.4	1	2.3	3.8	0	0	0	8.2	6.7	7.7	127	130	999	26	26	22	13	8	X	3	2	4	9	9	3	3	2	999	999	0	999
Anguis fragilis	CZECH_RE	48.73	14.11	F	A	0	193			12.3	13.3	8.1	6.9	0.45	1	2.5	4.2	0	0	0	8.9	8.4	8.4	132	136		26	25	21	12	8	A	0	3	3	8	7	3	3	0	0	0	0	0
Anguis fragilis	CZECH_RE	49.14	13.55	F	A	0	154	179		999	999	999	999	999	999	999	999	0	0	0	999	6.2	7.4	131	134	135	27	26	22	14	8	X	3	3	3	9	9	3	3	2	999	999	0	999
Anguis fragilis	CZECH_RE	49.41	15.52	F	A	0	172	999	999	999	999	999	999	999	999	999	999	999	999		999	999	999	133	138	999	28	26	22	14	999	A	0	3	3	999	999	999	999	0	0	0	0	0
Anguis fragilis	CZECH_RE	50.42	14.47	F	A	0	164			11.9	12.5	7.6	5.9	0.5	1.2	2.5	4.3	0	0	0	9	7.3	7.8	134	135		26	24	22	12	8	A	0	3	3	9	9	4	4	2	1	0	0	3
Anguis fragilis	CZECH_RE	48.69	14.08	F	A	0	128	999	999	10.4	999	999	999	0.4	1	2.1	3.9	0	0	0	8.4	6.8	8.1	138	141	999	26	26	22	12	8	A	0	3	3	8	9	4	4	2	1	1	0	4
Anguis fragilis	CZECH_RE	50	14.54	F	A	0	999	999	999	999	999	999	999	999	999	999	999	0	0	0	999	999	999	999	999	999	999	999	999	999	999	A	0	3	3	999	999	999	999	3	2	2	0	7
Anguis fragilis	CZECH_RE	49.03	13.57	999	A	0	133	135		9.8	11.1	6.4	5.1	0.3	0.8	2.2	4.1	0	0	0	7.7	5.5	6.5	131	999	121	26	25	20	12	8	A	0	3	3	8	9	3	2	0	0	0	0	0
Anguis fragilis	CZECH_RE	49.06	13.56	999	A	0	128	999	999	9.7	10.6	6.2	4.6	0.3	0.9	2.2	3.5	0	999		7.4	999	999	129	143	999	26	24	22	999	999	A	0	3	4	9	999	3	3	999	999	999	999	999
Anguis fragilis	CZECH_RE	48.91	13.83	999	A	0	125	148		9.1	10.2	999	999	999	999	999	999	0	0	0	999	999	999	134	138	142	26	24	21	13	8	A	0	3	3	8	9	4	4	0	999	999	0	999
Anguis fragilis	CZECH_RE	49.91	14.3	999	A	0	999	999	999	999	999	999	999	999	999	999	999	999	999		999	999	999	999	999	999	999	24	999	999	999	A	0	3	3	999	999	999	999	999	999	999	999	999
Anguis fragilis	CZECH_RE	49.12	13.43	999	A	0	137	999	999	999	999	999	999	999	999	999	999	999	999		999	999	999	137	137	999	28	28	999	999	999	C	2	3	3	999	999	999	999	2	1	0	0	3
Anguis fragilis	CZECH_RE	49.3	15.75	999	A	0	999	999	999	999	999	999	999	999	999	999	999	999	999		999	999	999	999	999	999	999	26	999	999	999	A	0	3	3	999	999	3	3	3	3	2	1	9
Anguis fragilis	CZECH_RE	49.28	13.26	999	A	0	120	134		999	999	999	999	999	999	999	999	999	999		999	999	999	999	999	999	999	26	999	999	999	A	0	999	999	999	999	999	999	3	999	999	0	999
Anguis fragilis	CZECH_RE	49.77	14.21	999	A	0	158	170		999	999	999	999	999	999	999	999	999	999		999	999	999	136	132	130	27	26	22	14	999	C	2	4	3	999	999	999	999	3	1	1	0	5
Anguis fragilis	CZECH_RE	49.32	13.7	999	A	0	139			10.3	11.6	999	999	999	999	999	999	0	0	0	999	999	999	136	138		28	26	22	12	8	C	2	3	3	999	999	999	999	999	999	999	999	999
Anguis fragilis	CZECH_RE	49.3	14.96	999	A	0	142			11.1	11.8	7.1	5.1	999	999	999	999	0	0	0	999	999	999	136	130		26	24	22	12	8	A	0	3	3	999	999	999	999	1	2	1	0	4
Anguis fragilis	CZECH_RE	48.66	14.16	999	A	0	150			12.5	14.1	7.6	5.6	0.5	1.2	2.5	4.7	0	0	0	8.6	5.9	6.3	140	137		27	24	22	12	999	999	999	999	999	999	999	999	999	3	2	1	0	6
Anguis fragilis	CZECH_RE	49.81	14.4	999	A	0	169	187		11.7	12.5	999	999	999	999	999	999	0	0	0	999	999	999	141	135	152	25	25	23	999	999	A	0	3	3	999	999	999	999	999	999	999	999	999
Anguis fragilis	CZECH_RE	49.78	14.15	999	A	0	192	999		12.4	14.1	999	999	999	999	999	999	999	999		999	999	999	129	142	130	26	25	22	12	999	A	0	3	3	999	999	999	999	999	999	999	999	999
Anguis fragilis	CZECH_RE	50.08	16.35	999	A	0	146	999	999	10.3	11.6	5.9	4.6	999	999	999	999	999	999		999	999	999	142	140	999	24	24	22	12	999	B	1	3	3	999	999	999	999	999	999	999	999	999
Anguis fragilis	CZECH_RE	50.06	14.09	999	A	0	999	999	999	999	999	999	999	999	999	999	999	999	999		999	999	999	999	999	999	999	24	999	999	999	A	0	999	999	999	999	999	999	999	999	999	999	999
Anguis fragilis	CZECH_RE	49.1	13.54	999	J	2	999	999	999	999	999	999	999	999	999	999	999	0	0	0	999	999	999	999	999	999	999	26	999	999	999	A	0	3	3	999	999	999	999	999	999	999	0	999
Anguis fragilis	CZECH_RE	49.1	13.54	999	J	2	999	999	999	999	999	999	999	999	999	999	999	0	0	0	999	999	999	999	999	999	999	25	999	999	999	A	0	3	3	999	999	999	999	999	999	999	0	999
Anguis fragilis	CZECH_RE	49.1	13.54	999	A	0	179	184		13.3	13.9	9.2	7.2	999	999	999	999	0	0	0	9.4	8.3	8.6	138	138	135	26	25	22	12	8	A	0	3	4	8	8	3	4	3	999	999	0	999
Anguis fragilis	CZECH_RE	50.12	12.23	999	A	0	150	158		11.5	11.7	7.1	5.7	0.4	1.1	2.2	4.5	0	1	1	7.3	6.8	7.3	135	140	134	26	24	22	14	8	A	0	3	3	999	999	999	999	2	1	1	0	4
Anguis fragilis	CZECH_RE	48.73	14.11	999	A	0	132	999	999	9.3	10.6	6.6	4.6	0.3	0.7	2.4	3.5	0	0	0	6.8	5.5	5.8	129	131	999	27	26	21	12	6	X	3	2	2	9	8	3	3	999	999	999	0	999
Anguis fragilis	CZECH_RE	50.41	14.44	999	A	0	123	999	999	11.7	999	999	999	999	999	999	999	999	999		999	999	999	138	140	999	999	26	22	12	999	B	1	3	3	999	999	4	4	2	1	2	0	5
Anguis fragilis	CZECH_RE	49	14.76	999	999	999	999	999	999	999	999	999	999	999	999	999	999	999	999		999	999	999	999	999	999	999	999	999	999	999	B	1	3	3	999	999	999	999	999	999	999	999	999
Anguis colchica	SLOVAKIA	49.11	19.21	M	A	0	138			11.8	12.5	7.4	5.05	0.4	0.8	2.1	4.1	1	1	2	7.8	6.5	6.8	135	138		30	28	23	14	8	C	2	999	999	999	999	999	999	2	1	0	0	3
Anguis colchica	SLOVAKIA	49.11	19.21	M	A	0	156	163		14.1	15.4	8.1	5.2	0.5	1.1	2.7	5	2	2	4	10	6.6	7.2	134	139	134	30	28	24	14	8	B	1	3	3	9	9	3	3	3	3	1	3	10
Anguis colchica	SLOVAKIA	49.11	19.21	M	A	0	194	216		16.6	17.7	9.2	7.6	0.7	1.3	2.8	5.7	2	2	4	11.5	8.3	9.4	133	139	135	30	28	24	14	8	C	2	3	3	9	9	4	4	3	3	1	3	10
Anguis colchica	SLOVAKIA	49.15	19.06	M	A	0	158	174		12.8	14.2	7.35	5.2	0.55	1.3	2.7	3.9	2	2	4	8.8	6.75	7.2	135	139	134	30	28	24	14	10	C	2	999	999	999	999	999	999	3	2	0	1	6
Anguis colchica	SLOVAKIA	49.11	19.21	M	A	0	159			13.4	14.6	7.5	5.9	0.7	1.1	2.9	4.9	2	1	3	10.2	7.2	7.2	135	140		28	26	24	14	8	C	2	3	3	7	9	4	4	3	3	1	2	9
Anguis colchica	SLOVAKIA	49.11	19.2	M	A	0	152	164		12.2	13.5	7.6	4.9	0.4	1.1	2.5	4.4	1	2	3	8.7	6.4	6.9	134	141	134	31	28	24	14	8	C	2	2	2	8	8	4	4	2	2	0	1	5
Anguis colchica	SLOVAKIA	48.4	18.75	M	A	0	261			20.4	22.5	13.1	9.8	1	1.7	3.7	7.9	2	2	4	13.1	11.7	12.1	139	147		30	30	24	14	9	C	2	3	3	999	999	999	999	3	3	3	3	12
Anguis colchica	SLOVAKIA	49.15	19.31	M	A	0	194			15.7	15.6	10	7.7	0.75	1.4	3	5.6	2	2	4	11.5	8.9	9	135	136		30	29	24	14	8	C	2	3	4	9	9	4	5	3	3	2	1	9
Anguis colchica	SLOVAKIA	48.61	18.08	M	A	0	133			11.4	12.2	6.5	4.6	0.5	1.1	2.5	4.1	1	1	2	7.5	5.1	5.4	139	141		30	28	24	14	8	C	2	3	3	9	9	4	4	3	1	1	0	5
Anguis colchica	SLOVAKIA	49.11	19.21	M	A	0	238			18.2	21.3	10.1	7.5	0.8	1.6	3.2	6.9	2	2	4	13.6	9.5	10.5	137	138		30	28	24	14	8	C	2	2	3	9	8	4	4	3	3	1	2	9
Anguis colchica	SLOVAKIA	49.11	19.21	M	A	0	190			16.8	17.4	10.3	7.5	0.9	1.5	3.3	5.8	2	2	4	10.8	8.9	9.8	132	138		32	28	24	14	8	C	2	3	3	9	8	4	4	3	3	1	2	9
Anguis colchica	SLOVAKIA	49.22	18.71	M	A	0	200	210		16.5	17.4	12.4	8.15	0.9	1.5	3	6.8	1	2	3	12.9	9.5	11.1	138	140	131	30	30	24	14	8	C	2	999	999	999	999	999	999	3	3	1	3	10
Anguis colchica	SLOVAKIA	49.22	18.7	M	A	0	229			17.1	18.4	11.6	7.8	0.9	1.6	3.2	6.9	2	2	4	13.15	9.8	10.8	135	140		30	30	22	15	8	C	2	999	999	999	999	999	999	3	3	0	3	9
Anguis colchica	SLOVAKIA	49.11	19.21	M	A	0	182			14.9	15.5	10.3	7.1	0.7	1.45	3.15	5.45	1	2	3	10.35	7.6	8.5	135	141		30	28	24	14	8	A	0	999	999	999	999	999	999	3	3	1	3	10
Anguis colchica	SLOVAKIA	48.66	18.81	M	A	0	169			12.8	13.5	8	5.8	0.8	1.2	2.4	4.7	2	2	4	9.7	6.7	8.2	139	146		30	28	24	14	8	B	1	999	999	999	999	999	999	3	2	0	2	7
Anguis colchica	SLOVAKIA	48.66	18.81	M	A	0	231			18.1	19.8	11.3	8.7	1	1.8	3.5	6.7	2	2	4	12.8	9.3	10.9	139	144		30	29	24	14	8	C	2	999	999	999	999	999	999	3	3	1	3	10
Anguis colchica	SLOVAKIA	48.73	21.58	M	A	0	174			13.4	14.7	10.5	8.3	0.6	1.05	2.7	5	2	2	4	9.9	9.3	10.2	137	142		30	27	24	14	8	C	2	999	999	999	999	999	999	3	3	1	1	8
Anguis colchica	SLOVAKIA	48.61	20.83	M	A	0	210			17.2	18	12.3	8.8	0.8	1.5	3.7	6	2	2	4	13	10.4	11.3	133	138		28	28	24	14	8	C	2	999	999	999	999	999	999	3	3	1	2	9
Anguis colchica	SLOVAKIA	48.8	22.02	M	A	0	245			18.4	19.6	15.4	12.2	0.85	1.5	3.6	6.7	2	2	4	12.4	999	13	139	144		30	30	24	999	9	C	2	999	999	999	999	999	999	3	3	1	2	9
Anguis colchica	SLOVAKIA	48.66	20.53	M	A	0	184	188		14.2	14.6	10.7	8.1	0.6	1	2.8	4.6	2	2	4	10.9	10	10.2	134	138	132	30	29	24	14	9	C	2	999	999	999	999	999	999	3	3	1	1	8
Anguis colchica	CZECH_RE	49.59	18.13	M	A	0	175	189		15.7	16.1	10.1	7.7	0.6	1.6	2.9	5.9	2	1	3	11	8.4	9.1	132	136	132	30	29	23	14	7	C	2	3	3	9	8	4	3	3	3	1	1	8
Anguis colchica	CZECH_RE	49.59	18.13	M	A	0	217			17.5	19	12.2	9.2	0.9	1.5	3.4	7.1	2	1	3	13	10.5	11	134	141		30	28	24	14	8	A	0	3	3	8	9	4	4	3	3	1	2	9
Anguis colchica	CZECH_RE	49.59	18.13	M	A	0	999	191		13.3	15	8.1	6.9	0.6	1.1	2.9	5.1	2	1	3	8.7	8.2	9.3	137	999	132	32	28	24	14	9	C	2	3	3	999	999	999	999	3	3	1	1	8
Anguis colchica	SLOVAKIA	49.2	21.23	M	A	0	180	198		15.1	16	10.6	8.5	0.7	1.6	2.8	5.9	2	2	4	999	999	999	999	999	999	999	28	999	999	999	C	2	999	999	999	999	999	999	3	3	1	1	8
Anguis colchica	CZECH_RE	49.59	18.13	M	A	0	191			16.9	20	13.2	9.5	0.75	1.8	3.4	6.7	2	2	4	13.1	11.5	11.9	134	141		30	28	24	13	8	C	2	3	3	999	999	999	999	3	3	1	2	9
Anguis colchica	SLOVAKIA	49.2	21.23	M	A	0	178			15.3	17.6	10.7	8.4	0.7	1.3	2.8	6	2	2	4	999	999	999	999	999	999	999	29	999	999	999	X	3	999	999	999	999	999	999	3	3	1	2	9
Anguis colchica	SLOVAKIA	49.12	22.35	M	A	0	999	999	999	12.5	14	8.9	6.1	0.6	1.3	2.8	4	0	0	0	10.1	999	999	999	999	999	30	28	999	999	999	C	2	3	3	8	9	3	3	3	2	1	0	6
Anguis colchica	SLOVAKIA	49.12	22.35	M	A	0	999	999	999	14.6	16.2	10.2	7.6	0.8	1.5	3.1	5.6	2	2	4	10.6	999	999	999	999	999	30	30	999	999	999	C	2	3	3	9	8	4	4	3	3	1	1	8
Anguis colchica	SLOVAKIA	49.12	22.35	M	A	0	166	174		14.2	16.2	9.4	7.1	0.7	1.4	2.9	5.4	2	2	4	10.2	7.9	8.6	137	139	138	30	28	24	14	8	C	2	3	3	7	8	3	4	3	3	1	3	10
Anguis colchica	CZECH_RE	49.05	17.88	M	A	0	181			14.5	15.8	10.4	7.5	0.7	1.2	3.3	5.1	0	0	0	9.7	10	9.3	140	138		28	27	23	14	8	C	2	4	3	999	999	999	999	3	2	1	1	7
Anguis colchica	SLOVAKIA	49.12	22.35	M	A	0	172			13.5	15.7	8.2	6.5	0.7	1.2	2.5	4.9	2	2	4	10	8.2	7.6	138	136		29	29	22	14	8	C	2	3	3	9	9	4	3	3	2	1	0	6
Anguis colchica	SLOVAKIA	49.12	22.35	M	A	0	173	183		13.6	14.8	9.7	7.4	0.8	1.6	2.8	5.7	2	2	4	11.5	7	8.5	137	144	134	31	28	24	14	8	C	2	3	3	8	8	4	4	3	3	1	2	9
Anguis colchica	SLOVAKIA	49.12	22.35	M	A	0	189			16.5	18.2	9.1	6.6	0.7	1.6	3.3	6	2	2	4	12.5	7.8	8.6	141	146		30	28	24	15	8	C	2	3	3	9	9	3	3	3	3	1	1	8
Anguis colchica	SLOVAKIA	49.12	22.35	M	A	0	148	161		13	15.2	7.5	5.9	0.6	1.3	2.8	4.9	1	1	2	9.7	6.7	6.2	134	138	133	29	29	24	14	8	C	2	3	3	8	8	3	3	3	1	0	2	6
Anguis colchica	SLOVAKIA	49.12	22.35	M	A	0	142	999	999	12.4	13.9	999	999	999	999	999	999	999	999		999	999	999	999	134	999	30	28	999	999	999	C	2	3	3	999	999	4	4	3	2	1	0	6
Anguis colchica	CZECH_RE	49.62	18.23	M	A	0	999	999	999	16.5	18	11.6	8.7	999	999	3.5	6.4	2	2	4	13.1	999	999	999	999	999	30	28	999	999	999	999	999	999	999	999	999	999	999	3	3	1	2	9
Anguis colchica	CZECH_RE	49.59	18.12	M	A	0	186			14.9	17	11	7.7	0.7	1.6	3.7	5.7	2	2	4	11.5	9.6	9.5	138	140	999	28	27	24	14	9	C	2	3	3	8	8	4	4	3	3	1	2	9
Anguis colchica	CZECH_RE	49.59	18.13	M	A	0	237			19.9	23	11.6	8.9	1	2.1	3.7	7.3	2	2	4	14.1	11.1	11.5	137	139		28	28	24	14	8	C	2	3	3	8	9	3	3	3	3	1	3	10
Anguis colchica	CZECH_RE	49.59	18.13	M	A	0	173	194		15	16.8	10	7.4	0.8	1.7	3	5.7	2	1	3	12	7.9	8.9	134	139	133	30	28	24	14	8	C	2	3	3	9	9	3	3	3	3	1	2	9
Anguis colchica	CZECH_RE	49.59	18.12	M	A	0	207	215		17.3	18.6	11	8.6	0.9	1.6	3.6	6.2	1	2	3	12.7	8.9	9.6	133	141	136	30	28	24	14	7	X	3	3	3	9	9	3	3	3	3	1	1	8
Anguis colchica	CZECH_RE	49.59	18.12	M	A	0	185			14.9	19.1	9.8	7	0.7	1.3	3.4	5.9	1	1	2	12	8.1	8.3	140	142		31	30	24	14	8	C	2	3	3	9	9	3	3	3	2	1	1	7
Anguis colchica	CZECH_RE	49.59	18.12	M	A	0	178			14.8	16	9.7	7.3	0.8	1.6	3	5.6	2	2	4	10.7	8	8.6	130	135		30	28	24	14	8	C	2	3	3	9	8	3	3	3	999	1	2	999
Anguis colchica	CZECH_RE	49.59	18.12	M	A	0	186			15.2	16.9	10	7.4	0.7	1.3	2.7	5.8	2	1	3	11.2	7.8	9	140	140		30	28	23	999	8	C	2	3	3	999	999	999	999	3	3	1	2	9
Anguis colchica	SLOVAKIA	49.15	21.13	M	A	0	999	999	999	999	999	999	999	999	999	999	999	2	2	4	999	999	999	134	143	139	30	28	23	14	8	C	2	999	999	999	999	999	999	3	3	2	1	9
Anguis colchica	SLOVAKIA	48.63	18.05	M	A	0	230	999		999	999	999	999	999	999	999	999	2	2	4	999	999	999	999	999	999	32	30	999	999	999	C	2	3	3	9	9	3	3	3	3	1	3	10
Anguis colchica	SLOVAKIA	48.62	18.06	M	A	0		999	999	999	999	999	999	999	999	999	999	999	999		999	999	999	999	999	999	999	30	24	16	8	999	999	999	999	999	999	999	999	3	3	2	0	8
Anguis colchica	SLOVAKIA	48.6	18.08	M	A	0	198			16.3	999	999	999	999	999	999	999	2	2	4	999	11.2	11	133	999		32	30	24	14	999	B	1	3	3	999	999	999	999	3	3	1	2	9
Anguis colchica	CZECH_RE	50.08	17.73	M	A	0	999	999	999	999	999	999	999	999	999	999	999	999	999		999	999	999	999	999	999	30	999	999	999	999	C	2	3	3	999	9	4	4	3	3	1	3	10
Anguis colchica	CZECH_RE	49.25	17.8	M	A	0	161	193		14.1	15.9	9.3	7.7	0.7	1.3	2.8	4.9	2	2	4	10.7	9.6	9.2	137	140	149	30	28	24	14	8	C	2	3	3	9	9	3	3	3	2	2	0	7
Anguis colchica	SLOVAKIA	49.22	18.71	M	A	0	174			14.3	14.8	8.4	6	0.8	1.1	2.1	5.4	999	999		8.6	7.1	7.7	138	144		31	31	24	15	8	C	2	999	999	999	999	999	999	0	3	0	0	3
Anguis colchica	SLOVAKIA	49.39	20.44	M	A	0	183	190		15.3	16.6	10.7	7.9	0.8	1.7	2.9	5.6	2	2	4	12.4	9.9	10.1	135	136	129	30	28	24	14	8	X	3	3	3	9	9	3	3	3	3	1	1	8
Anguis colchica	SLOVAKIA	49.11	19.21	F	A	0	188			13.2	14.3	8.4	6.3	0.6	1.3	2.7	5	1	1	2	9.5	8	8.2	128	135		31	29	24	14	8	C	2	3	3	9	9	4	4	2	1	0	0	3
Anguis colchica	SLOVAKIA	49.15	19.06	F	A	0	181	187		13.1	14.5	8	5.2	0.7	1.1	2.6	5.2	2	2	4	9.4	6.9	7.3	135		138	29	28	23	14	8	C	2	999	999	999	999	999	999	3	1	1	0	5
Anguis colchica	SLOVAKIA	49.03	20.12	F	A	0	162			12.5	13	7.2	5.5	0.7	1.1	2.1	4.8	2	1	3	8.6	6.3	7.4	132	137		30	29	24	14	8	B	1	999	999	999	999	999	999	0	0	0	0	0
Anguis colchica	SLOVAKIA	48.99	19.28	F	A	0	182	206		12.7	13.6	8.1	6.9	0.7	1.1	2.6	4.6	2	2	4	9.3	8	9	133	137	140	30	30	24	14	10	C	2	4	3	9	9	3	3	3	1	0	0	4
Anguis colchica	SLOVAKIA	49.11	19.21	F	A	0	185			13	14.6	8.3	6	0.6	1.2	2.6	4.9	2	2	4	9.4	7.6	8.3	138	141		30	28	24	14	8	C	2	3	3	999	999	999	999	2	1	0	0	3
Anguis colchica	SLOVAKIA	49.11	19.21	F	A	0	179	196		13.5	14.7	8.3	5.1	0.6	1.3	2.5	4.9	1	1	2	9.7	6.8	7.2	133	140	139	30	30	24	15	8	A	0	3	3	9	9	3	3	2	2	1	0	5
Anguis colchica	SLOVAKIA	49.11	19.21	F	A	0	195			14.2	16.3	8.5	6.7	0.8	1.5	2.8	5.9	2	2	4	10.5	7.1	7.2	139	143		29	28	24	13	8	C	2	3	3	9	8	4	3	2	1	0	0	3
Anguis colchica	SLOVAKIA	49.11	19.21	F	A	0	165			12.4	13.9	7.2	5.1	0.4	1.4	2.5	3.8	2	2	4	9.3	5.9	6.6	134	138		29	29	24	14	8	C	2	3	3	9	9	3	3	0	1	0	0	1
Anguis colchica	SLOVAKIA	49.11	19.21	F	A	0	192			13.5	15	7.7	5.5	0.7	1.4	3	5.8	2	2	4	11.5	7.5	8.2	129	134		30	29	24	14	8	C	2	2	3	9	8	4	4	1	1	0	1	3
Anguis colchica	SLOVAKIA	49.22	18.71	F	A	0	208			15.7	18.4	11.4	7.9	0.6	1.3	2.8	6	2	2	4	11.8	9	10.2	136	138		31	30	26	14	9	C	2	999	999	999	999	999	999	0	1	0	1	2
Anguis colchica	SLOVAKIA	49.11	19.21	F	A	0	171			12.3	14.6	8.1	5.2	0.5	1.1	2.4	4.65	1	1	2	9.6	6.6	7.9	134	141		30	28	23	14	9	C	2	999	999	999	999	999	999	0	1	0	0	1
Anguis colchica	SLOVAKIA	49.11	19.21	F	A	0	187	203		13.1	14.1	7.9	6.1	0.65	1.2	2.5	4.85	1	1	2	9.4	8.5	8.6	134	136	135	28	28	24	14	10	A	0	999	999	999	999	999	999	2	1	0	1	4
Anguis colchica	SLOVAKIA	49.11	19.21	F	A	0	196			13.8	14.7	9.2	6.2	0.6	1.2	2.7	4.8	2	2	4	11	7.2	8.5	136	145		31	30	23	14	8	B	1	999	999	999	999	999	999	2	1	0	0	3
Anguis colchica	SLOVAKIA	49.11	19.21	F	A	0	170	182		12.2	14.7	8	5.7	0.6	1.2	2.8	4.7	2	2	4	9	6.7	7	133	140	136	30	30	24	14	9	B	1	999	999	999	999	999	999	3	1	0	0	4
Anguis colchica	SLOVAKIA	49.11	19.2	F	A	0	179	189		13.1	14	8.4	5.4	0.6	1.1	2.7	4.8	2	2	4	9.1	6.7	7.9	132	138	134	30	27	24	14	8	C	2	999	999	999	999	999	999	2	1	0	0	3
Anguis colchica	SLOVAKIA	49.12	19.2	F	A	0	163			12.2	12.6	7.1	4.7	0.6	1	2.5	4.5	2	1	3	10.4	5.4	7.2	999	999	999	30	28	24	14	8	C	2	999	999	999	999	999	999	1	1	0	0	2
Anguis colchica	SLOVAKIA	49.11	19.21	F	A	0	182	215		12.6	14.9	8.5	5.5	0.55	0.9	2.6	5	2	2	4	8.9	6.8	8.5	136	138	143	30	28	23	14	10	C	2	999	999	999	999	999	999	1	1	0	0	2
Anguis colchica	SLOVAKIA	48.99	19.28	F	A	0	147	158		12.6	13	7	5.1	0.4	0.9	2.4	4.5	2	2	4	8.6	6.6	7	132	138	132	29	28	24	14	8	C	2	999	999	999	999	999	999	0	1	0	1	2
Anguis colchica	SLOVAKIA	48.99	19.28	F	A	0	164			12.2	13.6	7.9	5.3	0.5	0.9	2.4	4.45	2	2	4	8.9	6.8	8	135	138		28	28	24	14	8	C	2	999	999	999	999	999	999	0	1	0	0	1
Anguis colchica	SLOVAKIA	49.11	19.21	F	A	0	186			12.4	13.8	8.3	6.1	0.6	1.2	2.5	4.8	2	2	4	8.9	7.5	8.9	133	138		31	29	23	14	8	A	0	3	3	8	8	4	4	2	1	0	0	3
Anguis colchica	SLOVAKIA	47.83	18.75	F	A	0	203			14.9	15.8	9.2	6.1	0.7	1.1	3	5.2	1	1	2	9.7	8	9.7	135	143		28	28	24	14	8	C	2	3	3	9	9	3	3	3	1	1	1	6
Anguis colchica	SLOVAKIA	49.11	19.21	F	A	0	190			13.4	14.8	8.4	5.8	0.6	1.3	3	5.7	0	0	0	9.1	7.1	7.8	135	137		30	30	24	14	8	C	2	3	3	9	8	3	3	0	1	0	0	1
Anguis colchica	SLOVAKIA	49.11	19.21	F	A	0	201			14.7	15.9	9.2	6.4	0.7	1.2	2.8	5.4	0	0	0	9.8	8.4	9.3	139	141		30	30	24	14	8	C	2	3	3	999	999	999	999	2	1	0	1	4
Anguis colchica	SLOVAKIA	49	19.76	F	A	0	184			15.1	16.4	8.7	6.2	0.6	1.3	2.9	5.1	1	2	3	12.4	8.3	8.8	133	136		30	28	24	14	8	C	2	3	4	10	10	4	4	2	1	0	1	4
Anguis colchica	SLOVAKIA	49	19.76	F	A	0	184			13.7	15.2	8.4	7.1	0.6	1.4	2.7	5.4	2	2	4	11.1	8.6	9.1	135	138		30	28	24	14	8	A	0	3	3	9	9	3	3	1	1	0	1	3
Anguis colchica	SLOVAKIA	49	19.76	F	A	0	196	196		13.9	15.8	8.8	5.9	0.7	1.4	2.8	5.6	2	2	4	10.4	8.2	8.9	138	141	135	30	28	22	14	8	C	2	3	3	9	9	3	3	2	1	0	1	4
Anguis colchica	SLOVAKIA	49.11	19.21	F	A	0	174			13.4	14.1	8.3	5.6	0.5	1.3	2.5	4.9	2	2	4	9.8	7.7	8.1	130	141		30	28	24	14	8	C	2	3	3	9	9	3	3	3	1	0	1	5
Anguis colchica	SLOVAKIA	48.61	18.08	F	A	0	249			16.8	17.9	10.3	8.5	0.8	1.5	4	6.1	2	2	4	12.3	10.4	10.8	139	139		30	30	24	14	8	B	1	3	3	10	9	4	4	3	2	1	0	6
Anguis colchica	SLOVAKIA	48.61	18.08	F	A	0	226			15.5	17.6	9.3	7.2	0.7	1.5	3	5.4	2	2	4	11.6	8.4	9.9	137	141		30	28	24	14	8	C	2	3	3	9	9	3	3	3	1	0	0	4
Anguis colchica	SLOVAKIA	48.92	20.56	F	A	0	190			14.1	15	8	6.2	0.8	1.2	2.5	4.7	1	1	2	10.5	7.4	8.3	134	141		30	30	24	14	8	C	2	3	3	9	9	4	4	2	1	0	1	4
Anguis colchica	SLOVAKIA	48.92	20.56	F	A	0	177			13.9	15.5	8.1	5.5	0.7	1.3	2.5	5.3	0	0	0	9.4	7.4	7.6	134	136		30	30	24	16	8	A	0	3	3	9	9	4	4	2	1	0	0	3
Anguis colchica	SLOVAKIA	48.92	20.56	F	A	0	173	182		13.7	14.2	9	5.9	0.6	1.2	2.8	4.5	2	2	4	9.1	7.1	7.6	136	139	135	30	28	24	14	8	C	2	3	3	8	8	4	4	1	1	0	1	3
Anguis colchica	SLOVAKIA	49.13	19.22	F	A	0	188			13.4	14.1	8.3	6.3	0.6	1	2.5	4.7	2	2	4	9.8	8	8.6	137	141		31	29	24	13	8	C	2	3	3	9	9	4	3	2	1	0	0	3
Anguis colchica	SLOVAKIA	49.15	19.31	F	A	0	222			16.6	17.4	10.3	7.35	0.75	1.6	3.1	6.4	2	2	4	12.1	8.9	10.3	132	136		29	28	23	999	8	C	2	999	999	999	999	999	999	2	1	0	0	3
Anguis colchica	SLOVAKIA	49.11	19.21	F	A	0	181	193		13.5	14.9	8.3	5.4	0.7	1	2.6	5	1	1	2	10	6.8	8.7	137	139	136	28	28	22	14	9	C	2	999	999	999	999	999	999	0	1	0	0	1
Anguis colchica	SLOVAKIA	49.11	19.21	F	A	0	178	193		13.3	14	8.6	5.65	0.7	1.2	2.7	4.6	0	0	0	9.5	7.7	9.2	135	141	143	30	28	24	14	8	C	2	999	999	999	999	999	999	1	1	0	0	2
Anguis colchica	SLOVAKIA	49.11	19.21	F	A	0	171	181		12.4	13.7	8.1	5.7	0.5	1.2	2.5	4.8	1	1	2	9.1	6.8	7.9	136	140	141	28	28	24	14	8	C	2	3	3	9	9	4	4	2	1	0	0	3
Anguis colchica	SLOVAKIA	48.78	21.03	F	A	0	233			15.2	18.4	10.5	8.8	0.8	1.3	3.1	5.4	2	2	4	11.1	10	9.7	135	139		31	28	23	14	8	A	0	999	999	999	999	999	999	2	1	0	2	5
Anguis colchica	SLOVAKIA	49.15	20.79	F	A	0	189			13.8	15.3	999	999	0.5	1.1	2.8	5	2	2	4	10.2	999	999	137	139		31	30	24	14	10	C	2	999	999	999	999	999	999	0	0	0	0	0
Anguis colchica	SLOVAKIA	49.2	21.23	F	A	0	221			15.6	17	11.9	8.7	0.6	1.8	3.3	6.6	2	2	4	999	999	999	999	999	999	999	28	999	999	999	C	2	999	999	999	999	999	999	1	1	1	0	3
Anguis colchica	SLOVAKIA	49.2	21.23	F	A	0	179	189		12.9	15.9	9.5	7.9	0.5	1.2	2.7	4.9	2	2	4	999	999	999	999	999	999	999	28	999	999	999	C	2	999	999	999	999	999	999	1	1	0	0	2
Anguis colchica	SLOVAKIA	49.2	21.23	F	A	0	202			16.2	17.6	11	8.3	0.7	1.6	3	5.9	2	2	4	999	999	999	999	999	999	999	30	999	999	999	A	0	999	999	999	999	999	999	3	1	0	0	4
Anguis colchica	SLOVAKIA	49.2	21.23	F	A	0	137	150		12.5	14	7.6	5.9	0.5	1.2	2.6	4.2	2	2	4	999	999	999	999	999	999	999	28	999	999	999	C	2	999	999	999	999	999	999	0	1	0	0	1
Anguis colchica	SLOVAKIA	49.2	21.23	F	A	0	130	137		11.1	12	6.9	5.7	0.6	1.3	2.2	4.4	2	1	3	999	999	999	999	999	999	999	28	999	999	999	C	2	999	999	999	999	999	999	2	1	1	1	5
Anguis colchica	SLOVAKIA	48.85	20.13	F	A	0	166			13.4	14.8	9.2	7.1	0.7	1.2	2.8	5	2	1	3	9.6	10.6	10.2	132	140	999	30	29	24	999	8	C	2	3	3	9	9	3	3	1	1	1	0	3
Anguis colchica	SLOVAKIA	48.85	19.85	F	A	0	175			12.3	14.5	8.7	6.6	0.5	1.3	2.5	5.1	2	2	4	9.7	9.3	9.1	133	138		28	28	24	14	8	B	1	3	3	8	9	3	3	2	1	1	0	4
Anguis colchica	SLOVAKIA	49.12	22.35	F	A	0	181	178		14.7	16.1	9	6.8	0.6	1.3	2.9	5	2	1	3	10.2	7.4	8.5	136	144	126	30	28	24	14	8	X	3	3	3	9	10	3	3	2	1	1	0	4
Anguis colchica	SLOVAKIA	49.12	22.35	F	A	0	182	193		15	15.7	9.1	6.5	0.6	1.2	2.5	5.1	1	1	2	10.6	8.6	8.2	999	999	138	30	28	999	14	999	C	2	3	3	9	9	3	3	2	2	1	0	5
Anguis colchica	SLOVAKIA	49.12	22.35	F	A	0	199	197		15.8	17.3	10.9	7.3	0.7	1.4	3.2	5.6	2	2	4	10.9	8.7	10.4	139	146	139	30	28	24	14	9	C	2	3	3	8	8	3	3	2	1	0	0	3
Anguis colchica	SLOVAKIA	49.12	22.35	F	A	0	214			15.4	18	10.2	8.4	0.8	1.4	3.4	5.4	2	2	4	11.5	9.7	10.5	134	148		30	28	24	14	8	C	2	2	3	8	9	3	3	1	1	0	0	2
Anguis colchica	SLOVAKIA	49.12	22.35	F	A	0	181	191		13.2	15.6	9.9	7.6	0.6	1.3	3.2	5.4	2	2	4	9.8	8.2	9	136	139	133	30	28	24	14	999	C	2	3	3	8	9	4	3	2	1	0	0	3
Anguis colchica	SLOVAKIA	49.12	22.35	F	A	0	160	172		12.6	14.9	8	6.6	0.5	1.3	3.2	5.2	2	2	4	9	6.6	7.5	136	139	135	30	30	24	14	10	C	2	3	3	9	9	3	3	1	1	1	0	3
Anguis colchica	SLOVAKIA	49.12	22.35	F	A	0	194			14.1	14.7	8.9	7	0.7	1.5	3	5.4	2	2	4	10.6	9	8.9	136	143		31	30	26	16	9	C	2	3	3	9	8	3	3	3	1	1	0	5
Anguis colchica	SLOVAKIA	49.12	22.35	F	A	0	145			12	13.7	7.5	5.6	0.6	1.2	2.5	4.4	0	0	0	8.7	6.7	6.5	141	143		30	28	24	14	8	C	2	3	3	9	9	4	4	3	1	1	0	5
Anguis colchica	SLOVAKIA	49.12	22.35	F	A	0	154	171		12.6	13.9	8.5	6.4	0.6	1.3	3	4.7	2	2	4	9.3	7.7	8.6	136	139	138	30	28	24	14	8	C	2	3	3	10	9	4	4	2	1	1	0	4
Anguis colchica	SLOVAKIA	49.12	22.35	F	A	0	128			11.1	13.1	7.2	5.9	0.6	1	2.5	4.1	2	0	2	7	6.4	6.9	138	143		30	30	24	15	10	C	2	3	3	9	9	3	3	1	1	0	0	2
Anguis colchica	SLOVAKIA	49.12	22.35	F	A	0	123			10.8	12	6.1	4.7	0.4	1.1	2.3	3.7	0	0	0	7.3	4.9	5.6	135	144		30	28	23	13	10	C	2	3	3	8	9	3	3	1	1	0	0	2
Anguis colchica	SLOVAKIA	48.73	21.28	F	A	0	238			15.6	16.6	11.9	8.7	0.6	1.2	3.4	5.7	2	2	4	11.3	12.8	12.2	142	145		30	28	24	14	8	C	2	999	999	999	999	999	999	3	1	1	0	5
Anguis colchica	CZECH_RE	49.59	18.13	F	A	0	202	222		15.5	15.9	10.1	7.4	0.7	1.6	3.2	5.7	2	2	4	11.7	9.3	10.9	135	138	133	30	29	24	15	8	A	0	3	3	8	9	3	3	2	1	0	0	3
Anguis colchica	CZECH_RE	49.59	18.12	F	A	0	212			15	17	10	8.2	0.8	1.6	3.1	6	2	1	3	12.1	8.7	9.3	134	139		30	28	24	14	8	C	2	3	3	8	8	3	3	2	1	0	1	4
Anguis colchica	SLOVAKIA	49.39	20.44	F	A	0	196	216		15.8	17.5	9.9	6.7	0.8	1.5	3.2	5.6	0	0	0	10.1	9.5	10	134	141	145	29	28	24	14	8	C	2	3	3	8	8	4	4	1	1	0	0	2
Anguis colchica	CZECH_RE	49.04	18.03	F	A	0	217	231		15.7	18.8	11.1	8.7	0.7	1.5	3.4	6.1	2	2	4	11	10.6	10.9	141	141	136	29	28	24	14	8	C	2	3	2	999	999	999	999	0	0	0	0	0
Anguis colchica	SLOVAKIA	49.28	19.78	F	A	0	190			13.3	15.2	9.9	7.5	0.7	1.1	2.9	5.5	2	2	4	9.9	10.2	10.1	131	136		29	28	24	14	8	A	0	999	999	999	999	999	999	0	0	0	0	0
Anguis colchica	SLOVAKIA	48.61	18.07	F	A	0	186	999	999	999	999	999	999	999	999	999	999	2	999		999	8.7	10.5	134	138	999	30	999	24	14	8	C	2	3	3	9	9	3	3	2	1	0	0	3
Anguis colchica	SLOVAKIA	48.89	17.81	F	A	0	223	999	999	15.1	16.3	999	999	999	999	999	999	999	999		999	999	999	135	999	999	28	28	24	999	999	X	3	999	999	999	999	999	999	2	1	0	0	3
Anguis colchica	SLOVAKIA	48.89	17.75	F	A	0	160	999	999	15	15.7	9.2	7.6	999	999	3	5.6	1	2	3	11.4	10.1	10.4	132	138	999	30	28	24	12	8	C	2	3	3	8	8	3	3	3	2	1	1	7
Anguis colchica	SLOVAKIA	48.9	17.79	F	A	0	132	999	999	12	12.7	7.6	5.8	999	999	999	999	0	999		9.1	7.4	7.4	137	141	999	29	28	24	999	8	C	2	3	3	9	9	3	3	3	2	1	0	6
Anguis colchica	CZECH_RE	49.88	17.73	F	A	0	135	999	999	11.5	12.8	8.1	6.5	999	999	999	999	2	2	4	9.5	9.3	10	138	140	999	30	30	26	14	8	C	2	3	3	8	999	4	3	1	1	0	0	2
Anguis colchica	SLOVAKIA	48.74	19.07	F	A	0	203	999	999	14.6	15.8	11	7.9	0.8	1.6	2.6	5.9	2	2	4	11.4	10.5	11.3	139	144	999	30	30	24	14	8	C	2	3	3	9	9	3	3	2	1	1	1	5
Anguis colchica	SLOVAKIA	48.89	20.3	F	A	0	157			12	13.8	8.8	6.1	0.4	1.1	3	4.7	2	2	4	9.3	7.7	8	134	140		30	28	24	14	10	A	0	3	3	8	9	3	3	2	1	0	0	3
Anguis colchica	SLOVAKIA	49.11	19.21	F	A	0	138			14.3	15	7.5	5.1	0.6	1.1	2.4	4.7	1	1	2	8.2	5.7	5.9	140	146		30	28	24	14	8	B	1	3	3	9	8	4	3	1	1	1	0	3
Anguis colchica	SLOVAKIA	48.82	17.45	F	A	0	227			999	999	999	999	999	999	999	999	999	999		999	9	10.1	132	144		30	28	24	14	8	C	2	999	999	999	999	999	999	1	1	0	0	2
Anguis colchica	SLOVAKIA	49.11	19.21	F	A	0	999	999	999	999	999	999	999	999	999	999	999	999	999		999	999	999	999	999	999	999	999	999	999	999	999	999	999	999	999	999	999	999	999	999	999	999	999
Anguis colchica	SLOVAKIA	49.11	19.21	F	A	0	999	999	999	999	999	999	999	999	999	999	999	999	999		999	999	999	999	999	999	999	999	999	999	999	999	999	999	999	999	999	999	999	999	999	999	999	999
Anguis colchica	SLOVAKIA	49.11	19.21	F	A	0	999	999	999	999	999	999	999	999	999	999	999	999	999		999	999	999	999	999	999	999	999	999	999	999	999	999	999	999	999	999	999	999	999	999	999	999	999
Anguis colchica	SLOVAKIA	48.4	18.75	F	A	0	163	181		12.2	13.1	7.5	6.1	0.6	1.2	2.7	4.7	2	1	3	8	999	999	134	139	139	30	30	24	14	9	C	2	3	3	10	9	3	3	3	1	1	0	5
Anguis colchica	SLOVAKIA	49	19.28	F	A	0	165	999	999	12.6	13.8	7.6	6.1	0.6	1.1	2.3	4.6	2	2	4	8.7	999	999	999	144	999	30	28	999	14	8	C	2	3	3	8	8	3	3	2	1	0	0	3
Anguis colchica	SLOVAKIA	49.17	19.64	F	A	0	190			15.4	17.9	10.5	6.9	0.6	1.4	3.5	5.3	2	2	4	12	999	999	138	142		30	30	24	14	8	B	1	3	3	999	999	999	999	2	1	0	0	3
Anguis colchica	SLOVAKIA	48.71	18.12	F	A	0	132	999	999	999	999	999	999	999	999	999	999	999	999		999	999	999	999	999	999	30	28	999	999	999	B	1	999	999	999	999	999	999	3	1	1	0	5
Anguis colchica	SLOVAKIA	49.42	21.27	F	A	0	158	171		13.3	14.6	9	999	0.5	1.3	2.7	5.5	1	2	3	9.8	9.1	9.1	134	138	135	30	28	24	14	8	C	2	3	3	8	8	3	3	1	1	0	0	2
Anguis colchica	SLOVAKIA	48.65	18.59	F	A	0	172	204		15.1	16.6	9.7	7.3	0.7	1.4	2.6	5.6	2	2	4	9.8	9.3	10.3	137	141	136	28	28	24	14	8	C	2	3	3	9	10	3	3	3	1	1	0	5
Anguis colchica	SLOVAKIA	48.91	20.34	F	A	0	181	192		15.1	16.5	9.8	7	0.7	1.4	3.1	5.6	2	2	4	10.8	10.8	10.4	134	136	137	30	28	24	14	10	B	1	3	3	9	9	3	3	3	1	0	0	4
Anguis colchica	SLOVAKIA	49.39	20.44	F	A	0	198			14.9	16.5	9.5	7.2	0.7	1.5	3	5.7	1	1	2	10.9	10.2	10.6	135	144		30	28	24	14	10	C	2	3	3	9	9	3	3	0	0	0	0	0
Anguis colchica	SLOVAKIA	49.12	22.35	F	A	0	999	999	999	14.6	15	8.7	6.7	0.6	1.5	2.7	5.1	1	1	2	10	999	999	999	999	999	999	999	999	999	999	C	2	3	3	8	8	4	3	999	999	999	999	999
Anguis colchica	SLOVAKIA	49.12	22.35	F	A	0	999	999	999	14.2	14.9	8.7	6.8	0.6	1.4	2.5	5.5	2	2	4	10	999	999	999	999	999	999	999	999	999	999	C	2	3	3	9	8	3	3	999	999	999	999	999
Anguis colchica	SLOVAKIA	49.12	22.35	F	A	0	999	999	999	16.2	18.3	11.8	8.6	0.9	2.1	2.8	6.6	1	2	3	12.7	999	999	999	999	999	999	999	999	999	999	C	2	3	3	9	9	3	3	999	999	999	999	999
Anguis colchica	SLOVAKIA	49.12	22.35	F	A	0	999	999	999	15.5	15.6	9.1	6.9	0.7	1.5	2.5	5.7	2	1	3	10.1	999	999	999	999	999	999	999	999	999	999	C	2	3	3	9	10	3	3	999	999	999	999	999
Anguis colchica	SLOVAKIA	49.12	22.35	F	A	0	999	999	999	14.9	15.8	10	7.4	0.7	1.4	2.7	5.6	2	1	3	10.2	999	999	999	999	999	999	999	999	999	999	C	2	3	3	9	8	3	4	999	999	999	999	999
Anguis colchica	SLOVAKIA	49.12	22.35	F	A	0	999	999	999	14.4	15.1	9.5	7.4	0.7	1.4	2.6	5.3	2	2	4	11	999	999	999	999	999	999	999	999	999	999	C	2	3	3	8	8	3	3	999	999	999	999	999
Anguis colchica	SLOVAKIA	49.12	22.35	F	A	0	999	999	999	13.6	14.5	9	6.9	0.6	1.4	2.4	5	1	2	3	9.5	999	999	999	999	999	999	999	999	999	999	C	2	3	3	8	8	3	3	999	999	999	999	999
Anguis colchica	SLOVAKIA	49.16	20	999	A	0	172	999	999	999	999	999	999	999	999	999	999	999	999		999	999	999	999	999	999	999	999	999	999	999	999	999	999	999	999	999	999	999	999	999	999	999	999
Anguis colchica	SLOVAKIA	48.86	21.16	999	A	0	181	196		13.1	14.2	10.1	8.6	0.4	1.1	3.2	4.8	2	2	4	9	8.8	9.1	137	144	136	30	28	23	14	9	A	0	999	999	999	999	999	999	3	2	1	1	999
Anguis colchica	SLOVAKIA	48.6	21.47	999	A	0	148	173		11.5	12.8	8.2	5.9	0.4	1.1	2.6	4.4	2	2	4	8.2	7.1	7.9	137	142	148	30	28	24	14	10	C	2	999	999	999	999	999	999	3	2	1	0	6
Anguis colchica	SLOVAKIA	49.12	22.35	999	A	0	139			11.8	12.4	7.1	4.9	0.5	1.1	2.2	4.5	2	2	4	8.7	5.2	6.3	136	144		30	28	24	14	8	C	2	3	3	9	9	4	999	2	1	0	0	3
Anguis colchica	SLOVAKIA	48.99	20.24	999	A	0	198			15.8	18	12.1	9.1	0.9	1.4	3.1	5.9	1	1	2	11.9	11.6	11.4	132	134		30	28	23	13	9	C	2	999	999	999	999	999	999	3	3	2	3	11
Anguis colchica	SLOVAKIA	48.61	18.97	999	A	0		999	999	999	999	999	999	999	999	999	999	999	999		999	999	999	999	999	999	999	30	999	999	999	999	999	999	999	999	999	999	999	3	3	999	0	999
Anguis colchica	SLOVAKIA	48.94	19.36	999	A	0	158	999	999	13.3	14.2	999	999	999	999	999	999	999	2		999	999	999	133	136	999	30	29	24	14	8	X	3	3	3	9	10	3	3	3	1	1	1	6
Anguis colchica	SLOVAKIA	48.7	19.94	999	A	0	999	999	999	999	999	999	999	999	999	999	999	999	999		999	999	999	999	999	999	999	999	999	999	999	C	2	3	3	999	999	999	999	2	1	0	0	3
Anguis colchica	SLOVAKIA	48.7	19.94	999	A	0	999	999	999	11.8	999	999	999	999	999	999	999	999	999		999	999	999	999	999	999	32	30	999	999	999	B	1	3	3	999	999	999	999	2	1	0	0	3
Anguis colchica	SLOVAKIA	49.16	19.08	999	A	0	999	999	999	999	999	999	999	999	999	999	999	999	999		999	999	999	999	999	999	999	999	999	999	999	C	2	999	999	999	999	999	999	999	999	999	0	999
Anguis colchica	SLOVAKIA	48.68	18.91	999	A	0	206			999	999	999	999	999	999	999	999	2	2	4	999	999	999	999	999	999	999	28	24	14	999	C	2	999	999	999	999	999	999	3	3	1	1	8
Anguis colchica	SLOVAKIA	49.18	19.15	999	A	0	178	191		13.8	15.9	8.8	7	0.7	1.5	3	5.1	999	999		9.7	999	999	131	139	128	30	28	24	14	999	999	999	999	999	999	999	999	999	3	3	1	2	9
Anguis colchica	SLOVAKIA	48.68	18.91	999	A	0	999	999	999	999	999	999	999	999	999	999	999	999	999		999	999	999	999	999	999	999	999	999	999	999	999	999	999	999	999	999	999	999	999	999	999	999	999
Anguis colchica	SLOVAKIA	48.97	19.59	999	999	999	999	999	999	999	999	999	999	999	999	999	999	999	999		999	999	999	999	999	999	999	999	999	999	999	999	999	999	999	999	999	999	999	999	999	999	999	999
Anguis colchica	SLOVAKIA	48.97	19.59	999	999	999	999	999	999	999	999	999	999	999	999	999	999	999	999		999	999	999	999	999	999	999	999	999	999	999	999	999	999	999	999	999	999	999	999	999	999	999	999
Hybrid	SLOVAKIA	48.25	17.11	M	A	0	195	237		15.8	16.7	9.9	7.5	1	1.4	3	5.7	0	0	0	12	9.7	11.1	135	137	144	27	24	22	15	8	A	0	3	3	9	9	3	4	3	3	3	3	12
Hybrid	SLOVAKIA	48.16	17.22	M	A	0	210			15	16.1	10.4	7.3	0.7	1.5	2.8	5.4	0	0	0	9.7	9.1	9.8	136	140		26	24	999	999	8	X	3	999	999	999	999	999	999	3	3	2	0	8
Hybrid	SLOVAKIA	48.15	17.07	M	A	0	162	187		12.9	13.6	8.7	6.3	0.6	1.15	2.6	4.9	0	0	0	9.3	8	9	134	139	143	27	26	23	14	8	A	0	999	999	999	999	999	999	3	2	3	0	8
Hybrid	SLOVAKIA	48.16	17.22	M	A	0	207			16.4	17.15	10.75	7.2	0.8	1.2	3.2	6	0	1	1	11	9.8	10.6	135	140		26	24	22	12	8	B	1	999	999	999	999	999	999	3	3	2	0	8
Hybrid	SLOVAKIA	48.11	17.16	M	A	0	146			12	12.9	7.3	5.1	0.5	0.9	2.1	4.4	0	0	0	7.1	5.8	6.8	131	136		28	26	22	12	8	A	0	3	3	8	8	3	3	2	2	1	0	5
Hybrid	SLOVAKIA	48.11	17.16	M	A	0	210			16.8	18.3	10	7.7	0.7	1.3	3.2	6.4	0	0	0	12	8.6	9.8	136	137		26	25	22	12	8	C	2	3	3	8	8	4	4	3	3	3	3	12
Hybrid	SLOVAKIA	48.15	17.07	M	A	0	137	170		11.6	11.7	6.8	5.2	0.6	0.7	2	4.4	1	1	2	7.7	6.1	6.8	129	140	153	28	26	22	14	8	A	0	999	999	999	999	999	999	2	2	3	0	7
Hybrid	SLOVAKIA	48.41	17.19	M	A	0	149	180		10.9	11.5	6.9	5.1	0.5	1	2.1	4	0	0	0	8	5.5	6.5	135	142	145	28	28	22	14	8	B	1	4	3	10	10	4	4	3	1	1	0	5
Hybrid	SLOVAKIA	48.15	17.07	M	A	0	184			13.8	15.6	9.4	7	0.6	1.45	2.8	5.9	0	1	1	9.9	7.9	9	130	140		27	26	23	14	8	C	2	3	3	9	8	3	3	3	3	3	2	11
Hybrid	SLOVAKIA	48.15	17.07	M	A	0	178	219		13.4	14.6	8.6	6.6	0.6	1.1	2.5	5	0	0	0	9.1	7.3	8.5	133	137	150	26	26	22	14	8	A	0	3	3	9	10	3	3	3	3	3	0	9
Hybrid	SLOVAKIA	48.11	17.16	M	A	0	188	227		14.4	16.5	9.3	7.1	0.7	1.2	2.8	5.6	1	1	2	10.7	7.8	8.9	135	138	140	28	26	22	14	8	C	2	4	4	999	999	999	999	3	1	1	1	6
Hybrid	SLOVAKIA	48.16	17.22	M	A	0	202	240		15.2	15.4	10.2	7.6	0.8	1.2	2.9	5.6	2	2	4	10.9	9.8	10.5	127	142	148	26	26	22	12	8	A	0	999	999	999	999	999	999	3	1	3	0	7
Hybrid	SLOVAKIA	48.16	17.22	M	A	0	148	201		11.6	11.5	8.3	5.6	0.5	1.3	2.4	3.8	2	1	3	7.7	7	7.95	131	142	155	26	26	22	12	8	B	1	999	999	999	999	999	999	3	2	1	0	6
Hybrid	SLOVAKIA	48.48	17.06	M	A	0	173			13.9	13.8	8.9	7	0.6	1	2.8	5.5	0	0	0	10.8	7.6	8.6	139	141		28	24	22	15	8	A	0	999	999	999	999	999	999	3	3	1	3	10
Hybrid	SLOVAKIA	48.15	17.07	M	A	0	223			17	18.4	12.1	9.4	0.9	1.6	3.1	6.3	1	1	2	13.5	10.6	11.8	131	142		28	28	24	14	8	B	1	3	3	9	8	3	3	3	3	3	1	10
Hybrid	SLOVAKIA	48.15	17.07	M	A	0	190			14.9	15.5	9.8	7.1	0.7	1.3	2.6	5.8	1	1	2	11	8.8	10	132	140		26	24	22	14	8	A	0	3	3	8	8	3	4	3	3	3	1	10
Hybrid	SLOVAKIA	48.62	17.24	M	A	0	214			16.3	18.6	9.7	7.1	0.7	1.5	2.9	5.7	1	1	2	12.5	8.1	8.8	135	141		30	26	22	14	8	C	2	3	3	9	10	3	3	3	3	2	1	9
Hybrid	SLOVAKIA	48.62	17.24	M	A	0	222			16.5	19.6	10.2	7.7	0.7	1.5	2.9	5.9	1	0	1	12.4	9.2	9.8	139	140		28	26	24	14	8	A	0	3	3	8	8	4	4	3	3	2	3	11
Hybrid	SLOVAKIA	48.15	17.07	M	A	0	156	194		11.4	12.9	7.6	5.45	0.7	0.95	2.3	3.8	0	0	0	7.9	6.7	7.3	135	138	149	26	24	22	13	8	A	0	999	999	999	999	999	999	3	2	2	0	7
Hybrid	SLOVAKIA	48.15	17.07	M	A	0	163	186		12.2	12.7	8.15	5.7	0.7	1.2	2.2	4.8	1	1	2	8.6	7.4	8.7	132	136	137	28	26	22	14	8	A	0	999	999	999	999	999	999	3	3	2	0	8
Hybrid	SLOVAKIA	48.16	17.22	M	A	0	193			14	14.7	9.4	5.5	0.6	1	2.5	5.6	1	1	2	10	8.1	9.4	131	133		28	26	23	13	8	A	0	999	999	999	999	999	999	3	2	2	0	7
Hybrid	SLOVAKIA	48.18	17.02	M	A	0	175	219		13.8	15.1	8.9	6.45	0.7	1.2	3.1	5.4	2	2	4	10.7	8	8.6	140	149	147	27	27	22	14	8	A	0	999	999	999	999	999	999	3	3	3	0	9
Hybrid	SLOVAKIA	48.1	17.16	M	A	0	201			15.3	16.3	9.9	7.7	0.7	1.4	2.7	5.9	1	1	2	10.9	7.6	9.3	138	141		26	24	22	13	8	C	2	3	3	9	8	3	3	3	3	2	1	9
Hybrid	SLOVAKIA	48.1	17.16	M	A	0	167	199		12.6	13.7	8	5.9	0.5	1.3	2.4	4.8	0	0	0	9.2	7.2	7.7	133	139	141	27	26	22	14	8	B	1	3	3	9	9	4	4	2	2	1	1	6
Hybrid	SLOVAKIA	47.89	17.6	M	A	0	152			11.1	12.1	7.4	5.2	0.5	0.8	2.4	4.1	1	1	2	7.7	6.1	7.3	142	147		28	28	24	14	8	B	1	4	4	9	9	4	4	2	1	1	0	4
Hybrid	SLOVAKIA	47.89	17.6	M	A	0	172			12.4	13.6	10.1	5.9	0.5	1	2.8	4.6	1	1	2	10	7	9	136	138		27	26	22	14	8	A	0	3	3	9	9	4	4	2	1	2	0	5
Hybrid	SLOVAKIA	48.41	16.96	M	A	0	174	194		14.8	15.1	8.95	5.2	0.7	1.05	2.6	5.4	0	1	1	10.6	7.1	8.15	137	139	146	28	26	24	14	8	A	0	999	999	999	999	999	999	3	3	3	1	10
Hybrid	SLOVAKIA	48.26	17.15	M	A	0	174	211		13.6	15.6	9.3	6.2	0.7	1.2	3	4.9	0	0	0	9.5	7	9.2	132	135	139	26	26	22	14	8	B	1	999	999	999	999	999	999	3	3	2	3	11
Hybrid	CZECH_RE	48.78	16.81	M	A	0	185	999	999	13.8	14.9	999	999	999	999	999	999	0	0	0	999	9	9.5	136	139		28	26	22	14	8	B	1	3	3	999	999	3	4	3	3	1	0	7
Hybrid	CZECH_RE	50.59	16.16	M	A	0	193			13.7	13.7	10.2	7.9	0.6	1.2	2.9	5.6	2	2	4	12	9.8	9.7	131	140	999	27	24	22	12	8	A	0	4	3	9	10	4	3	3	999	999	0	999
Hybrid	CZECH_RE	48.93	16.61	M	A	0	179	999	999	15.6	999	999	999	999	999	999	999	999	999		999	999	999	134	136	999	28	26	22	999	999	C	2	3	3	999	999	3	3	3	1	2	0	6
Hybrid	SLOVAKIA	48.48	17.06	M	A	0	165			12.2	13.6	7	5.1	0.7	1	2.3	4.4	1	0	1	9.2	6.4	7.1	137	141		26	26	22	12	8	A	0	999	999	999	999	999	999	3	3	3	2	11
Hybrid	SLOVAKIA	48.24	17.1	M	A	0	189			14.2	15.8	9.8	7.4	0.5	1.3	2.9	5.1	0	0	0	9.5	9.2	9.8	134	138		27	25	22	14	9	A	0	999	999	999	999	999	999	3	3	2	0	8
Hybrid	SLOVAKIA	48.27	17.05	M	A	0	188	999	999	13.9	15.1	9.3	6.4	0.7	1.1	2.7	4.9	0	0	0	10	999	10	137	142	999	28	999	22	14	8	B	1	2	2	9	9	3	3	3	3	2	0	8
Hybrid	SLOVAKIA	48.43	17.04	M	A	0	187	999	999	999	999	999	999	999	999	999	999	999	999		999	999	999	999	142	999	999	28	999	999	999	A	0	3	3	999	999	999	999	999	999	2	0	999
Hybrid	SLOVAKIA	48.45	17.25	M	A	0	183			14.1	16.1	9.7	7.1	0.7	1.7	3.6	5.9	0	0	0	10.9	8.7	9.8	137	145		28	28	24	15	9	A	0	3	3	9	8	3	4	3	3	2	3	11
Hybrid	SLOVAKIA	48.42	17	M	A	0	166	999	999	999	999	999	999	999	999	999	999	999	999		999	999	999	999	139	999	28	26	999	999	999	A	0	999	999	999	999	999	999	999	999	1	0	999
Hybrid	SLOVAKIA	48.15	17.07	F	A	0	162			12.3	12	6.9	5.1	0.5	1.2	2.3	4.5	1	2	3	7.4	8.2	9	131	143		28	25	22	14	8	A	0	999	999	999	999	999	999	2	0	2	0	4
Hybrid	SLOVAKIA	48.48	17.06	F	A	0	161	183		12	13.2	7.1	4.8	0.5	0.8	2.2	4.5	0	1	1	7.4	7.25	7.4	138	145	143	27	26	22	14	9	B	1	999	999	999	999	999	999	3	0	0	0	3
Hybrid	SLOVAKIA	48.48	17.06	F	A	0	165			11.5	12.9	7.4	5.1	0.4	1.1	2.25	4.4	1	0	1	7.2	6.6	7.4	138	143		26	24	22	14	8	X	3	999	999	999	999	999	999	3	1	0	0	4
Hybrid	SLOVAKIA	48.16	17.22	F	A	0	173			11.4	13	7.6	5.1	0.5	1	2.1	4.2	1	1	2	8.7	4.6	7.1	138	141		26	25	22	12	8	C	2	999	999	999	999	999	999	2	1	1	0	4
Hybrid	SLOVAKIA	48.15	17.07	F	A	0	189			12.5	14	8.1	5.7	0.5	0.9	2.3	4.5	0	0	0	7.9	7.3	8.4	136	141		28	28	24	14	8	A	0	999	999	999	999	999	999	3	1	1	0	5
Hybrid	SLOVAKIA	48.15	17.07	F	A	0	178	215		12.3	13.9	7.8	5.9	0.7	1	2.3	4.9	0	0	0	8.5	6.9	8.7	130	135	149	27	26	22	14	8	C	2	999	999	999	999	999	999	2	1	1	0	4
Hybrid	SLOVAKIA	48.1	17.16	F	A	0	196			13.3	15.1	8.3	5	0.5	1	2.4	5	1	1	2	8.7	7.4	8.4	137	142		27	26	22	14	8	A	0	999	999	999	999	999	999	0	0	0	0	0
Hybrid	SLOVAKIA	48.16	17.22	F	A	0	189			12.6	13.1	8.4	5.5	0.5	1.3	2.5	4.8	0	0	0	9.2	7.6	8.8	139	143		26	24	22	12	8	C	2	3	3	8	8	3	3	2	1	1	0	4
Hybrid	SLOVAKIA	48.15	17.07	F	A	0	165	195		11.1	11.7	6.8	4.8	0.4	0.9	2.2	4	1	1	2	6.9	6.15	7.2	132	139	145	26	26	22	14	8	A	0	3	3	9	10	4	4	2	1	0	0	3
Hybrid	SLOVAKIA	48.15	17.07	F	A	0	181			11.6	13.6	7.4	5.1	0.4	0.8	2.2	4.4	1	0	1	7.5	6.4	7.4	131	137		29	26	23	14	8	B	1	999	999	999	999	999	999	3	2	2	0	7
Hybrid	SLOVAKIA	48.15	17.07	F	A	0	203	231		13.8	15.4	9	6.2	0.5	0.8	2.6	4.7	0	1	1	10	7.4	8.7	134	137	143	28	27	22	14	9	B	1	999	999	999	999	999	999	2	1	0	0	3
Hybrid	SLOVAKIA	48.19	17.1	F	A	0	173			13.2	13.2	7.9	5.8	0.6	1.4	2.7	4.7	1	1	2	8.8	6.7	7.8	128	135		30	26	22	14	8	A	0	3	3	9	9	4	4	0	1	0	0	1
Hybrid	SLOVAKIA	48.27	16.96	F	A	0	203			14.7	16.3	9.7	6.2	0.7	1.2	3.2	5.5	1	0	1	10.8	8.1	9.7	136	138		26	26	22	14	8	C	2	999	999	999	999	999	999	2	1	0	0	3
Hybrid	SLOVAKIA	48.16	17.22	F	A	0	131			10	10.9	6	4.8	0.4	1	2.15	3.55	0	0	0	6.85	4.95	6.1	136	140		28	26	22	14	8	A	0	3	3	9	9	4	4	1	0	1	0	2
Hybrid	SLOVAKIA	48.15	17.07	F	A	0	182	233		13.2	14	8.3	6.2	0.6	1.4	2.9	4.8	1	1	2	8.7	8	8.8	132	135	151	26	26	22	14	8	A	0	4	4	8	8	4	3	1	2	2	0	5
Hybrid	SLOVAKIA	48.16	17.22	F	A	0	142			11	11.5	6.4	4.9	0.5	1	2.1	3.8	0	0	0	6.7	5.1	6.2	134	139		26	24	22	12	7	A	0	3	3	9	9	3	3	2	0	1	0	3
Hybrid	SLOVAKIA	48.15	17.07	F	A	0	182			12.8	13	7.8	6.4	0.6	1.1	2.45	4.7	0	0	0	9.2	8.1	8.8	133	137		28	28	22	14	8	A	0	3	3	9	9	3	4	1	1	1	0	3
Hybrid	SLOVAKIA	48.23	17.2	F	A	0	238			15.9	16.6	10.4	7	0.8	1.5	2.9	6	0	0	0	11.2	10.1	10.9	135	141		28	26	22	14	8	A	0	3	3	8	8	4	4	1	0	1	1	3
Hybrid	SLOVAKIA	48.15	17.07	F	A	0	170			11.7	12.3	7.4	6.2	0.6	1.3	2.65	4.5	0	0	0	8.1	7.8	8.8	134	137		28	26	24	14	8	A	0	999	999	999	999	999	999	1	2	1	0	4
Hybrid	SLOVAKIA	47.89	17.6	F	A	0	185	211		11.8	13.2	8	6.6	0.5	1.1	2.3	4.4	1	1	2	8.7	7.6	8.8	137	140	149	28	26	24	14	8	A	0	3	3	8	9	4	4	2	1	1	0	4
Hybrid	SLOVAKIA	47.89	17.6	F	A	0	172	211		12.3	14.4	7.9	5.8	0.6	1.3	2.8	4.6	0	0	0	9.4	7.1	8.3	133	141	147	28	26	22	14	8	B	1	3	3	9	9	4	4	0	1	0	0	1
Hybrid	SLOVAKIA	48.16	17.22	F	A	0	200			12.75	14.8	8.4	6	0.6	1.2	2.6	4.8	0	0	0	9.2	8.5	9.1	136	139		26	24	20	12	8	C	2	3	3	9	9	3	3	0	1	1	0	2
Hybrid	SLOVAKIA	48.27	17.19	F	A	0	219	241		15.6	16.2	9.8	6.9	0.8	1.2	3.2	5.4	0	0	0	9.7	9.7	9.7	133	137	135	26	26	24	14	8	A	0	999	999	999	999	999	999	3	1	1	0	5
Hybrid	CZECH_RE	50.08	16.76	F	A	0	183			12.7	14.8	8.2	6.1	0.5	1.2	2.8	4.5	0	0	0	9.6	8	8.3	141	138		28	26	22	13	8	X	3	3	4	999	999	999	999	0	1	1	0	2
Hybrid	CZECH_RE	50.59	16.16	F	A	0	142	150		10.8	11.1	6.9	5.4	0.4	0.9	2.3	3.6	0	0	0	7.8	6.9	7	128	134	123	26	24	22	12	8	A	0	3	3	8	8	3	3	1	999	999	0	999
Hybrid	CZECH_RE	50.59	16.16	F	A	0	192	195		13.2	13.7	8.4	6.2	0.5	1.2	2.5	4.8	0	0	0	9.1	8.5	8.3	139	144	120	26	26	22	14	8	B	1	3	3	9	9	4	4	999	999	999	999	999
Hybrid	SLOVAKIA	48.15	17.07	F	A	0	999	999	999	12.3	13.4	9.2	7	0.5	1.1	2.6	4.9	0	0	0	9.4	999	999	999	999	999	28	999	999	999	999	B	1	999	999	999	999	999	999	999	999	999	999	999
Hybrid	SLOVAKIA	48.15	17.07	F	A	0	187			13	13.7	8.6	6	0.5	1	2.5	4.9	0	0	0	8.5	8.4	9.2	134	140		28	26	22	14	8	A	0	999	999	999	999	999	999	1	1	1	0	3
Hybrid	CZECH_RE	48.84	16.64	F	A	0	999	999	999	11.5	13	8.2	6.5	0.5	1	999	999	0	0	0	8.7	999	999	999	999	999	26	26	999	999	999	A	0	3	3	999	999	4	4	2	1	0	0	3
Hybrid	SLOVAKIA	48.28	17.21	F	A	0	218			15.8	16.1	10.5	7.4	0.9	1.5	999	999	2	2	4	11.4	11.2	11	128	134		27	26	24	14	9	A	0	3	3	9	9	5	5	999	999	999	999	999
Hybrid	SLOVAKIA	48.58	17.01	F	A	0	206			15.3	17.4	11	7	0.8	1.6	3.3	5.9	1	0	1	12	10.7	11.3	134	138	999	28	26	22	14	8	A	0	3	3	9	9	4	4	999	999	999	999	999
Hybrid	SLOVAKIA	48.58	17.01	F	A	0	145	999	999	10.7	11.1	999	999	999	999	999	999	0	0	0	999	999	999	134	137	999	28	26	24	14	8	A	0	3	3	999	999	3	3	3	0	0	0	3
Hybrid	SLOVAKIA	48.15	17.07	F	A	0	999	999	999	14.2	15.1	9.6	7.5	0.6	1	2.5	5.1	0	0	0	9.3	999	999	999	999	999	28	999	24	999	9	A	0	999	999	999	999	999	999	999	999	999	999	999
Hybrid	SLOVAKIA	48.15	17.07	F	A	0	999	999	999	14.8	15.6	9.5	7.4	0.7	1.5	2.8	5.1	0	0	0	9.9	8.2	9.7	999	999	999	999	999	999	999	999	A	0	999	999	999	999	999	999	2	2	2	0	6
Hybrid	SLOVAKIA	48.11	17.16	F	A	0	999	999	999	999	999	999	999	999	999	999	999	999	999		999	999	999	999	999	999	999	999	999	999	999	C	2	999	999	999	999	999	999	999	999	999	999	999
Hybrid	SLOVAKIA	48.15	17.07	F	A	0	174	207		11.5	13	7.45	5.4	0.5	0.9	2.2	4.3	1	1	2	8.4	9	8.3	132	135	144	28	26	22	14	8	A	0	3	3	8	8	4	4	3	2	1	0	6
Hybrid	CZECH_RE	49.25	16.58	999	A	0	194			999	999	999	999	999	999	999	999	0	0	0	999	999	999	129	136		27	26	22	999	8	A	0	3	4	999	999	999	999	3	2	1	0	6
Hybrid	CZECH_RE	49.25	16.35	999	A	0	127	143		9.1	10.2	6.4	4.9	0.4	1	2.2	3.7	0	0	0	6.1	5.6	6	134	137	147	26	26	24	14	7	A	0	4	3	8	8	4	3	3	1	1	0	5
Hybrid	SLOVAKIA	48.15	17.07	999	S	1	174			10.3	11.6	6.2	4.4	0.3	0.7	2	4.2	0	0	0	6.4	4.9	5.2	999	999	999	999	999	999	999	999	999	999	999	999	999	999	999	999	999	999	999	999	999
Hybrid	SLOVAKIA	48.23	17.21	999	A	0	147	999	999	11.7	12.5	7.8	5.6	0.5	0.9	2.7	4.1	0	0	0	8.4	999	999	137	141	999	26	26	22	999	999	A	0	3	3	9	9	3	3	3	2	1	0	6
Hybrid	SLOVAKIA	48.34	17.29	999	A	0	999	999	999	999	999	999	999	999	999	999	999	999	999		999	999	999	999	999	999	999	999	999	999	999	X	3	3	3	999	999	999	999	1	1	2	0	4
Hybrid	SLOVAKIA	48.34	16.98	999	A	0	215	999	999	999	999	999	999	999	999	999	999	999	999		999	999	999	999	999	999	999	999	999	999	999	B	1	999	999	999	999	999	999	2	0	0	0	2
Hybrid	SLOVAKIA	48.15	17.07	999	A	0	999	999	999	999	999	999	999	999	999	999	999	999	999		999	999	999	999	999	999	999	999	999	999	999	999	999	999	999	999	999	999	999	999	999	999	999	999
Hybrid	SLOVAKIA	48.19	17.02	999	A	0	138	167		11.6	12.6	6.4	4.7	0.4	0.8	2.5	4.2	0	0	0	7.4	5.3	6.2	133	140	145	26	26	22	13	6	A	0	999	999	999	999	999	999	3	1	1	0	5
Hybrid	SLOVAKIA	48.15	17.07	999	A	0	136	999	999	999	999	999	999	999	999	999	999	999	999		999	999	999	999	999	999	999	999	999	999	999	A	0	3	3	999	999	999	999	0	1	0	0	1
